# Supplementary material for: Feasibility of a Community Healthy Eating and Cooking Intervention Featuring Traditional African Caribbean Foods from Participant and Staff Perspectives
Source: MDPI journal article supplement (doi:10.3390/nu15173758), 2023-08-28
Supplement: s1 [file s1]

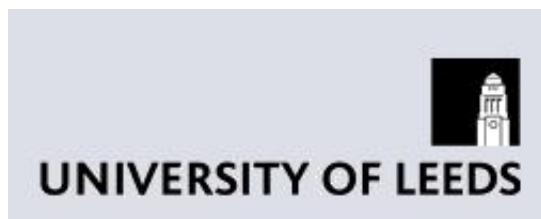

## Participant Post session questionnaire

---

Dear participants,

Please complete a short questionnaire (10-15 minutes), which involves questions about your experience and perceptions about the sessions.

What is your name? (Used to match your responses from the pre-session questionnaires only for research purposes) *Required*

3. After attending the sessions, to what extent do the following describe your cooking practice?

|                                                   | Responses             |                       |                            |                       |                       |
|---------------------------------------------------|-----------------------|-----------------------|----------------------------|-----------------------|-----------------------|
|                                                   | Completely disagree   | Disagree              | Neither agree nor disagree | Agree                 | Completely agree      |
| Being able to cook from raw or simple ingredients | <input type="radio"/> | <input type="radio"/> | <input type="radio"/>      | <input type="radio"/> | <input type="radio"/> |
| Following a simple recipe                         | <input type="radio"/> | <input type="radio"/> | <input type="radio"/>      | <input type="radio"/> | <input type="radio"/> |
| Planning meals before shopping                    | <input type="radio"/> | <input type="radio"/> | <input type="radio"/>      | <input type="radio"/> | <input type="radio"/> |
| Shopping for food on a budget                     | <input type="radio"/> | <input type="radio"/> | <input type="radio"/>      | <input type="radio"/> | <input type="radio"/> |
|                                                   | <input type="radio"/> | <input type="radio"/> | <input type="radio"/>      | <input type="radio"/> | <input type="radio"/> |

4. When finding recipes to cook, what is most important to you after attending the sessions?

Please select 1 answer(s) per row.

|                                                    | Not at all important     | Slightly important       | Important                | Very important           | Extremely important      |
|----------------------------------------------------|--------------------------|--------------------------|--------------------------|--------------------------|--------------------------|
| Finding a healthy and nutritious recipe            | <input type="checkbox"/> |
| Finding a recipe to suit myself and who I cook for | <input type="checkbox"/> |

|                                                                        |                          |                          |                          |                          |                          |
|------------------------------------------------------------------------|--------------------------|--------------------------|--------------------------|--------------------------|--------------------------|
| Finding a recipe to suit a particular dietary requirement              | <input type="checkbox"/> |
| Finding a recipe that incorporates traditional African Caribbean foods | <input type="checkbox"/> |
| Finding a recipe that has been recommended to me                       | <input type="checkbox"/> |

Where do you buy or obtain food from (Tick all that apply)? *Required*

☐ Supermarket
 ☐ Local store/shop
 ☐ Market
 ☐ Take away (on street or online)
 ☐ Food bank/pantry
 ☐ Cafe/restaurant
 ☐ Other

5.a. If you selected Other, please specify:

5.b. Has this changed since you participated in the healthy eating and cooking sessions?

6. Roughly, how much money do you spend on food each week? *Required*

- ☐ £10 - £20
- ☐ £20 - £40
- ☐ £40 - £60
- ☐ £60 - £80
- ☐ £80 - £100
- ☐ £100 and above
- ☐ Prefer not to say

### Page 3: Questions on the eatwell guide, dietary guidelines and awareness

7. Following the sessions, please tick the items that describe your eating habits. (Tick all that apply)

- ☐ Consuming fruits and vegetables
- ☐ Drinking water every day
- ☐ Maintaining a balanced diet
- ☐ Food portion control
- ☐ Avoiding foods rich in sugar
- ☐ Reduced fats and oils
- ☐ Avoiding processed foods and consuming whole foods
- ☐ Eating a healthy snack
- ☐ Other

*Required*

7.a. If you selected Other, please specify:

8. What is the recommended amount of portions of fruit and vegetable that should be consumed every day? (Tick one option) *Required*

- ☐ 2 portions
- ☐ 5 portions
- ☐ 7 portions
- ☐ Not sure

9. What is the daily recommended allowance for salt (in grams) for adults? (Tick one option) *Required*

- ☐ Less than 2g
- ☐ 2-4g
- ☐ 4-6g
- ☐ Not sure

10. What is the daily recommended allowance for free sugars (in grams) for adults?  
(Tick one option)

Required

☐ Under 10g

☐ 10-20g

☐ 20-30g

☐ Not sure

11. Are you aware of (State yes/ no as appropriate) the following?:

- Healthy eating guidelines which include to African Caribbean foods (Eatwell guide)
- Healthier recipes using African Caribbean traditional foods and ingredients.
- The daily allowance recommendations for sugars, salt, saturated fats and fruits and vegetables etc. with reference to African Caribbean foods.

12. Are you familiar with the African-Caribbean Eatwell guide as shown in the picture above? Required

☐ Yes

☐ No

☐ Not Sure

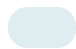

13. Following the session, please answer the next set of questions based on what you feel is true for you.

|                                                                                                                                        | Response              |                       |                            |                       |                       |
|----------------------------------------------------------------------------------------------------------------------------------------|-----------------------|-----------------------|----------------------------|-----------------------|-----------------------|
|                                                                                                                                        | Strongly disagree     | Disagree              | Neither agree nor disagree | Agree                 | Strongly agree        |
| In a typical week, I intend to consume 5 portions of fruit and vegetable every day.                                                    | <input type="radio"/> | <input type="radio"/> | <input type="radio"/>      | <input type="radio"/> | <input type="radio"/> |
| In a typical week, I intend to limit my consumption of red meat.                                                                       | <input type="radio"/> | <input type="radio"/> | <input type="radio"/>      | <input type="radio"/> | <input type="radio"/> |
| In a typical week, I intend to include low-fat dairy products/alternatives.                                                            | <input type="radio"/> | <input type="radio"/> | <input type="radio"/>      | <input type="radio"/> | <input type="radio"/> |
| In a typical week, I intend to limit my salt, sugar, and fat consumption.                                                              | <input type="radio"/> | <input type="radio"/> | <input type="radio"/>      | <input type="radio"/> | <input type="radio"/> |
| In a typical week, I intend to use healthier cooking methods like steaming, grilling, baking, etc instead of frying, deep frying, etc. | <input type="radio"/> | <input type="radio"/> | <input type="radio"/>      | <input type="radio"/> | <input type="radio"/> |
| In a typical week, I intend to include beans, soy, lentils, pulses, and other protein sources.                                         | <input type="radio"/> | <input type="radio"/> | <input type="radio"/>      | <input type="radio"/> | <input type="radio"/> |
| In a typical week, I intend to limit my consumption of alcohol.                                                                        | <input type="radio"/> | <input type="radio"/> | <input type="radio"/>      | <input type="radio"/> | <input type="radio"/> |
| In a typical week, I intend to drink water over any other beverage.                                                                    | <input type="radio"/> | <input type="radio"/> | <input type="radio"/>      | <input type="radio"/> | <input type="radio"/> |

In a typical week, I intend to include fish as a part of my diet.

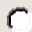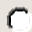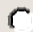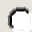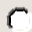



## Page 4: Questions on your experience/perception of the sessions

14. After taking part in the activities, how confident are you of the below-listed statements?

|                                                                           | Responses             |                       |                       |                       |                       |
|---------------------------------------------------------------------------|-----------------------|-----------------------|-----------------------|-----------------------|-----------------------|
|                                                                           | Not confident at all  | Slightly confident    | Confident             | Very confident        | Extremely confident   |
| I am now confident about using these recipes in my day-to-day cooking.    | <input type="radio"/> |
| I am now confident about using healthier ingredients to cook recipes.     | <input type="radio"/> |
| I am now confident about cooking healthier recipes within my food budget. | <input type="radio"/> |

15. Please rate the following based on your perceptions of the sessions: *Required*

Please don't select more than 1 answer(s) per row.

Please select at least 3 answer(s).

|                                                                                          | Dissatisfied | Slightly satisfied | Satisfied | Very satisfied | Extremely satisfied |
|------------------------------------------------------------------------------------------|--------------|--------------------|-----------|----------------|---------------------|
| The healthy eating learning session with the African Caribbean Eatwell guide (Session 1) |              |                    |           |                |                     |

|                                                                             |                          |                          |                          |                          |                          |
|-----------------------------------------------------------------------------|--------------------------|--------------------------|--------------------------|--------------------------|--------------------------|
| Group discussion session with researchers                                   | <input type="checkbox"/> |
| Cooking the selected healthier African-Caribbean recipes (Session 2)        | <input type="checkbox"/> |
| Watching videos of the African-Caribbean healthier recipes and recipe cards | <input type="checkbox"/> |

16. After attending both activity sessions, is there something that you have changed or intend to change for yourself or in your household? Please explain below. (ie what food you buy, how you cook your food etc) *Required*

17. How do you think you will use and apply the information gained from the sessions? (Tick all that apply)

- ☐ Share the new recipes with friends and family
- ☐ Share knowledge around healthy eating guidelines with friends and family
- ☐ Share knowledge on African Caribbean Eatwell guide and recommendations with friends and family
- ☐ Other

*Required*

17.a. If you selected Other, please specify:

18. Do you have any other feedback or comments about the sessions?

Thank you for taking the time to take part in the post-session questionnaire! Your time is greatly appreciated.

---
